# Supplementary material for: Starch-Based Aerogels Obtained via Solvent-Induced Gelation
Source: MDPI journal article supplement (doi:10.3390/gels6030032), 2020-09-19
Supplement: s1 [file s1]

*Supplementary Materials*

# Starch-Based Aerogels Obtained via Solvent-Induced Gelation

**Mirelle Dogenski**<sup>1,\*</sup>, **Pavel Gurikov**<sup>2,\*</sup>, **Victor Baudron**<sup>3</sup>, **J. Vladimir de Oliveira**<sup>1</sup>, **Irina Smirnova**<sup>3</sup> and **Sandra R. S. Ferreira**<sup>1,\*</sup>

<sup>1</sup> Department of Chemical and Food Engineering, Federal University of Santa Catarina, 88040-900, Florianópolis, Brazil; jose.vladimir@ufsc.br

<sup>2</sup> Laboratory for Development and Modelling of Novel Nanoporous Materials, Hamburg University of Technology, Eißendorfer Straße 38, 21073, Hamburg, Germany

<sup>3</sup> Institute of Thermal Separation Processes, Hamburg University of Technology, Eißendorfer Straße 38, 21073, Hamburg, Germany; victor.baudron@tuhh.de (V.B.); irina.smirnova@tuhh.de (I.S.)

\* Correspondence: mirelledogenski@gmail.com (M.D.); pavel.gurikov@tuhh.de (P.G.); s.ferreira@ufsc.br (S.R.S.F.); Tel.: +55-48-3721-2537 (S.R.S.F.); +49 40-428-784-275 (P.G.); +55-48 3721-4069 (M.D.)

Table S1. Visual appearance of the samples prepared with different starch concentrations, type of solvent, and solvent-to-DMSO mass ratios.

| Solv.-to-DMSO Mass Ratio | Water         | Propylene Glycol | Glycerol      | Sulfolane     | 2-Dimethyl Ethanolamine |
|--------------------------|---------------|------------------|---------------|---------------|-------------------------|
| 20:80                    |               |                  |               |               |                         |
| 30:70                    |               |                  |               |               |                         |
| 50:50                    |               |                  |               |               |                         |
| 70:30                    |               |                  |               |               |                         |
| 80:20                    |               |                  |               |               |                         |
| Starch conc. (%)         | 3 5 7.5 10 15 | 3 5 7.5 10 15    | 3 5 7.5 10 15 | 3 5 7.5 10 15 | 3 5 7.5 10 15           |

Rectangles: red=liquid; yellow=thick liquid; green=gel-like; blue=strong gel

### Volume fraction calculation for the solvent/DMSO mixtures

The volume fractions of the solvent/DMSO mixtures were obtained as follows:

**For water as solvent:** first, the density of water/DMSO mixtures ( $\rho$ ) was calculated according to Equation (1) [34]:

$$c(\rho) = a_6 \times \rho^6 + a_5 \times \rho^5 + a_4 \times \rho^4 + a_3 \times \rho^3 + a_2 \times \rho^2 + a_1 \times \rho + a_0 \quad (1)$$

for  $c < 82\%$ ,  $(R^2 = 0,9990)$

where  $a_0, a_1, a_2, a_3, a_4, a_5,$  and  $a_6$  are the polynomial parameters and  $c(\rho)$  is the weight concentration of DMSO. Then, the volume fractions were calculated according to Equation (2):

$$\rho = \rho_{DMSO} \times \frac{V_{DMSO}}{V} + \rho_{water} \times \frac{V_{water}}{V} \quad (2)$$

where  $\rho_{DMSO}$  and  $\rho_{water}$  are the densities of DMSO and water, respectively;  $\frac{V_{DMSO}}{V}$  and  $\frac{V_{water}}{V}$  correspond to the volume fractions of DMSO and water, respectively.

**For the other solvents:** the density of all other solvent/DMSO mixtures were calculated considering the volume additivity (Equation (3)), due to lack of experimental values or models in literature. Then, the volume fractions were obtained (Equation (4)):

$$V = \frac{m_{additive}}{\rho_{additive}} + \frac{m_{DMSO}}{\rho_{DMSO}} \quad (3)$$

$$v_i = \frac{V_i}{V} \quad (4)$$

where:  $m_{solvent}$  and  $m_{DMSO}$ , are the mass of the solvent and DMSO, respectively;  $\rho_{solvent}$  and  $\rho_{DMSO}$  are the density of the solvent and DMSO, respectively;  $V$  is the total volume of the mixture,  $V_i$  is the volume of compound  $i$ ;  $v_i$  is the volume fraction of compound  $i$ .

**Table S2.** Calculated solubility parameters of mixture for different solvent/DMSO mixtures and visual appearance of samples.

| Solvent                 | Sample                   | Solubility parameters of the mixture |                       |                       |                       | Visual appearance           |    |     |    |      |
|-------------------------|--------------------------|--------------------------------------|-----------------------|-----------------------|-----------------------|-----------------------------|----|-----|----|------|
|                         | Solv.-to-DMSO Mass Ratio | $\delta_{d,m}$                       | $\delta_{p,m}$        | $\delta_{h,m}$        | $\delta_{t,m}$        | Starch Concentration (wt.%) |    |     |    |      |
|                         |                          | (MPa <sup>1/2</sup> )                | (MPa <sup>1/2</sup> ) | (MPa <sup>1/2</sup> ) | (MPa <sup>1/2</sup> ) | 3                           | 5  | 7.5 | 10 | 15   |
| Water                   | 0:100                    | 18.4                                 | 16.4                  | 10.2                  | 26.7                  |                             |    |     |    |      |
|                         | 20:80                    | 18.2                                 | 16.4                  | 12.1                  | 27.3                  | L                           | L  | L   | L  | L    |
|                         | 30:70                    | 18.1                                 | 16.4                  | 14.1                  | 28.1                  | L                           | TL | TL  | GL | GL   |
|                         | 50:50                    | 17.4                                 | 16.3                  | 21.4                  | 32.1                  | TL                          | GL | GL  | SG | SG   |
|                         | 70:30                    | 16.6                                 | 16.1                  | 31.1                  | 38.7                  | TL                          | GL | SG  | SG | n.d. |
|                         | 80:20                    | 16.3                                 | 16.1                  | 34.3                  | 41.2                  | TL                          | GL | SG  | SG | n.d. |
|                         | 100:0                    | 15.6                                 | 16.0                  | 42.3                  | 47.8                  |                             |    |     |    |      |
| Propylene glycol        | 0:100                    | 18.4                                 | 16.4                  | 10.2                  | 26.7                  |                             |    |     |    |      |
|                         | 20:80                    | 18.1                                 | 14.9                  | 12.9                  | 26.8                  | L                           | L  | L   | L  | L    |
|                         | 30:70                    | 17.9                                 | 14.2                  | 14.3                  | 27.0                  | L                           | L  | L   | L  | L    |
|                         | 50:50                    | 17.6                                 | 12.8                  | 16.9                  | 27.6                  | TL                          | TL | GL  | GL | SG   |
|                         | 70:30                    | 17.3                                 | 11.4                  | 19.5                  | 28.5                  | TL                          | GL | GL  | GL | n.d. |
|                         | 80:20                    | 17.1                                 | 10.7                  | 20.8                  | 29.0                  | GL                          | GL | GL  | GL | n.d. |
|                         | 100:0                    | 16.8                                 | 9.4                   | 23.3                  | 30.2                  |                             |    |     |    |      |
| Glycerol                | 0:100                    | 18.4                                 | 16.4                  | 10.2                  | 26.7                  |                             |    |     |    |      |
|                         | 20:80                    | 18.1                                 | 15.6                  | 13.6                  | 27.5                  | L                           | L  | L   | L  | L    |
|                         | 30:70                    | 18.0                                 | 15.2                  | 15.4                  | 28.1                  | L                           | L  | L   | L  | L    |
|                         | 50:50                    | 17.7                                 | 14.4                  | 19.1                  | 29.7                  | L                           | L  | TL  | GL | GL   |
|                         | 70:30                    | 17.3                                 | 13.5                  | 23.0                  | 31.8                  | TL                          | GL | GL  | GL | n.d. |
|                         | 80:20                    | 17.2                                 | 13.1                  | 25.0                  | 33.0                  | GL                          | GL | GL  | GL | n.d. |
|                         | 100:0                    | 16.8                                 | 12.1                  | 29.3                  | 35.9                  |                             |    |     |    |      |
| Sulfolane               | 0:100                    | 18.4                                 | 16.4                  | 10.2                  | 26.7                  |                             |    |     |    |      |
|                         | 20:80                    | 18.4                                 | 16.4                  | 9.7                   | 26.5                  | L                           | L  | L   | L  | L    |
|                         | 30:70                    | 18.4                                 | 16.5                  | 9.4                   | 26.4                  | L                           | L  | L   | L  | L    |
|                         | 50:50                    | 18.4                                 | 16.5                  | 8.9                   | 26.3                  | L                           | L  | L   | L  | L    |
|                         | 70:30                    | 18.4                                 | 16.5                  | 8.3                   | 26.1                  | TL                          | GL | GL  | GL | L    |
|                         | 80:20                    | 18.4                                 | 16.6                  | 8.0                   | 26.0                  | TL                          | TL | TL  | GL | n.d. |
|                         | 100:0                    | 18.4                                 | 16.6                  | 7.4                   | 25.9                  |                             |    |     |    |      |
| 2-dimethyl ethanolamine | 0:100                    | 18.4                                 | 16.4                  | 10.2                  | 26.7                  |                             |    |     |    |      |
|                         | 20:80                    | 17.9                                 | 14.7                  | 11.4                  | 25.8                  | L                           | L  | L   | L  | L    |
|                         | 30:70                    | 17.6                                 | 13.9                  | 12.0                  | 25.4                  | L                           | L  | L   | L  | L    |
|                         | 50:50                    | 17.1                                 | 12.4                  | 13.0                  | 24.8                  | L                           | L  | L   | L  | L    |
|                         | 70:30                    | 16.7                                 | 11.1                  | 14.0                  | 24.4                  | L                           | L  | L   | L  | n.d. |
|                         | 80:20                    | 16.5                                 | 10.4                  | 14.4                  | 24.3                  | L                           | L  | L   | L  | n.d. |
|                         | 100:0                    | 16.1                                 | 9.2                   | 15.3                  | 24.0                  |                             |    |     |    |      |

L = liquid; TL = thick liquid; GL = gel-like; SG = strong gel; n.d = not determined.

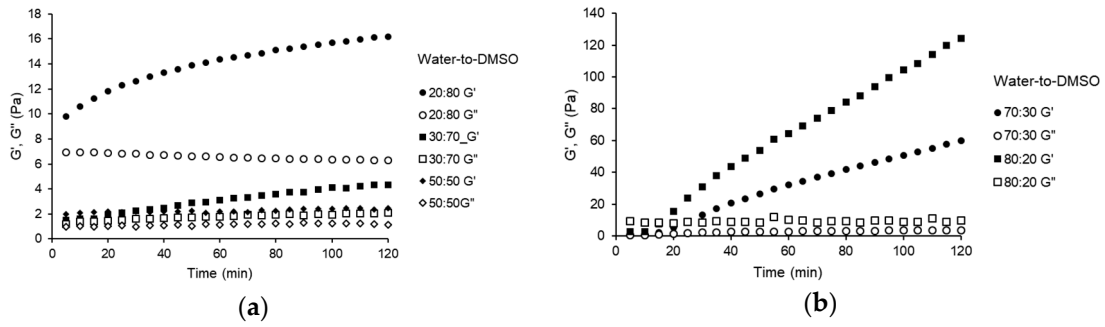

**Figure S1.**  $G'$  and  $G''$  profile of gel samples containing 5% of starch and different water-to-DMSO proportions: (a) 20:80, 30:70, and 50:50; (b) 70:30 and 80:20.

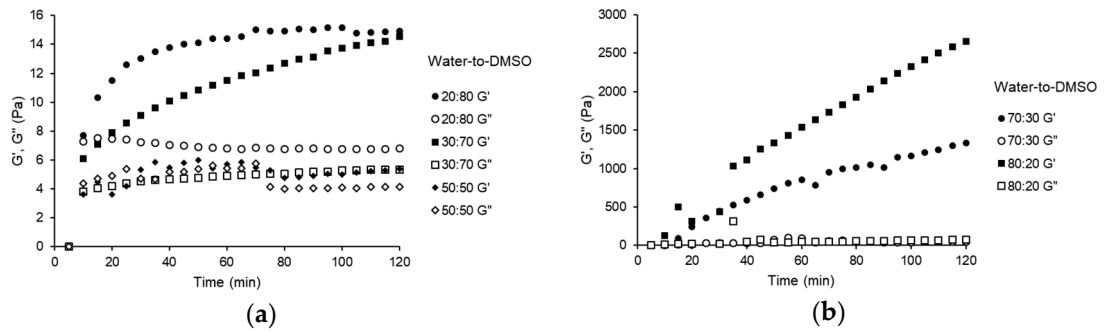

**Figure S2.**  $G'$  and  $G''$  profile of gel samples containing 7.5% of starch and different water-to-DMSO proportions: (a) 20:80, 30:70, and 50:50; (b) 70:30 and 80:20.

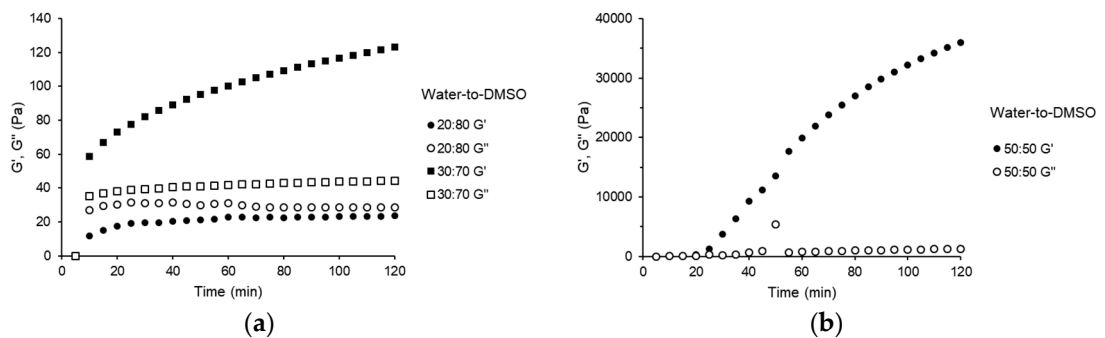

**Figure S3.**  $G'$  and  $G''$  profile of gel samples containing 15% of starch and different water-to-DMSO proportions: (a) 20:80, 30:70, and 50:50; (b) 70:30 and 80:20.

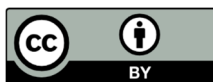

© 2020 by the authors. Licensee MDPI, Basel, Switzerland. This article is an open access article distributed under the terms and conditions of the Creative Commons Attribution (CC BY) license (<http://creativecommons.org/licenses/by/4.0/>).
